# Supplementary material for: Pathogens Spillover from Honey Bees to Other Arthropods
Source: MDPI journal article supplement (doi:10.3390/pathogens10081044), 2021-08-17
Supplement: s1 [file s1]

Table S1. Bee pathogen spillover and prevalence identified in hymenopteran hosts, of which are reported condition, stage, geographical area and year.

| Host                           |           |                         | Geographic area | Year  | Pathogen                            | Prevalence (%) | Reference |
|--------------------------------|-----------|-------------------------|-----------------|-------|-------------------------------------|----------------|-----------|
| Taxon                          | Condition | Stage                   |                 |       |                                     |                |           |
| <b>BEE</b>                     |           |                         |                 |       |                                     |                |           |
| <u>Andrenidae</u>              |           |                         |                 |       |                                     |                |           |
| <i>Andrena</i> spp.            | Wild      | Adult                   | France          | 2021  | ABPV                                | 25.0%          | [100]     |
|                                |           |                         |                 |       | IAPV                                | 25.0%          |           |
|                                |           |                         |                 |       | BQCV                                | 25.0%          |           |
|                                |           |                         | U.S.A.          | 2005  | BQCV <sup>A</sup>                   | 25.0%          | [38]      |
|                                |           |                         |                 |       | SBV <sup>A</sup>                    | 12.5%          |           |
|                                |           |                         |                 |       | DWV <sup>A</sup>                    | 62.5%          |           |
|                                | 2008      | <i>Wolbachia</i> spp.   | 69.2%           | [128] |                                     |                |           |
|                                |           | <i>Ascosphaera</i> spp. | 84.6%           |       |                                     |                |           |
| <i>Andrena bicolor</i>         | Wild      | Adult                   | Germany         | 2014  | DWV                                 | -              | [109]     |
|                                |           |                         | Georgia         |       | DWV                                 | -              |           |
| <i>Andrena haemorrhoa</i>      | Wild      | Adult                   | Germany         | 2014  | DWV*                                | -              | [109]     |
| <i>Andrena helianthi</i>       | Wild      | Adult                   | U.S.A.          | 2013  | IAPV                                | 16.7%          | [127]     |
|                                |           |                         |                 |       | SBV                                 | 41.7%          |           |
|                                |           |                         |                 |       | DWV                                 | 66.7%          |           |
|                                |           |                         |                 |       | LSV                                 | 25.0%          |           |
| <i>Andrena helianthiformis</i> | Wild      | Adult                   | U.S.A.          | 2013  | IAPV                                | 16.7%          | [127]     |
|                                |           |                         |                 |       | SBV                                 | 41.7%          |           |
|                                |           |                         |                 |       | DWV                                 | 66.7%          |           |
|                                |           |                         |                 |       | LSV                                 | 25.0%          |           |
| <i>Andrena helvola</i>         | Wild      | Adult                   | Germany         | 2014  | DWV                                 | -              | [109]     |
| <i>Andrena labialis</i>        | Wild      | Adult                   | France          | 2021  | ABPV                                | 100%           | [100]     |
| <i>Andrena rudbeckiae</i>      | Wild      | Adult                   | U.S.A.          | 2013  | IAPV                                | 16.7%          | [127]     |
|                                |           |                         |                 |       | SBV                                 | 41.7%          |           |
|                                |           |                         |                 |       | DWV                                 | 66.7%          |           |
|                                |           |                         |                 |       | LSV                                 | 25.0%          |           |
| <i>Andrena thoracica</i>       | Wild      | Adult                   | Kyrgyzstan      | 2014  | DWV                                 | 100%           | [109]     |
| <i>Andrena trimmerana</i>      | Wild      | Adult                   | Georgia         | 2014  | DWV                                 | -              | [109]     |
| <i>Andrena ventralis</i>       | Wild      | Adult                   | Belgium         | 2012  | LSV <sup>B</sup>                    | 100%           | [37]      |
|                                |           |                         |                 |       | <i>AmFV</i> <sup>B</sup>            | 100%           |           |
|                                |           |                         |                 |       | <i>N. ceranae</i> <sup>B</sup>      | 100%           |           |
|                                |           |                         |                 |       | <i>Apicystis bombi</i> <sup>B</sup> | 100%           |           |
| <i>Andrena vaga</i>            | Wild      | Adult                   | Belgium         | 2012  | BQCV <sup>C</sup>                   | 33.4%          | [37]      |
|                                |           |                         |                 |       | SBV <sup>C</sup>                    | 33.4%          |           |
|                                |           |                         |                 |       | LSV <sup>C</sup>                    | 100%           |           |
|                                |           |                         |                 |       | <i>AmFV</i> <sup>C</sup>            | 100%           |           |
|                                |           |                         |                 |       | <i>C. bombi</i> <sup>C</sup>        | 100%           |           |
|                                |           |                         |                 |       | <i>Apicystis bombi</i> <sup>C</sup> | 100%           |           |
| <i>Andrena wilkella</i>        | Wild      | Adult                   | U.S.A.          | 2013  | IAPV                                | 16.7%          | [127]     |
|                                |           |                         |                 |       | SBV                                 | 41.7%          |           |
|                                |           |                         |                 |       | DWV                                 | 66.7%          |           |
|                                |           |                         |                 |       | LSV                                 | 25.0%          |           |
| <i>Melandrena</i> spp.         | Wild      | Adult                   | U.S.A.          | 2014  | BQCV                                | 31.1%          | [210]     |
|                                |           |                         |                 |       | SBV                                 | 6.70%          |           |
|                                |           |                         |                 |       | DWV                                 | 10.0%          |           |
| <u>Apidae</u>                  |           |                         |                 |       |                                     |                |           |
| <i>Anthophora plumipes</i>     | Wild      | Adult                   | Georgia         | 2014  | ABPV                                | -              | [109]     |
|                                |           |                         | Germany         |       | ABPV                                | -              |           |
|                                |           |                         | Kyrgyzstan      |       | ABPV                                | -              |           |
|                                |           |                         | Georgia         |       | IAPV                                | -              |           |
|                                |           |                         | Germany         |       | IAPV                                | -              |           |
|                                |           |                         | Kyrgyzstan      |       | IAPV                                | -              |           |
|                                |           |                         | Georgia         |       | BQCV                                | -              |           |
|                                |           |                         | Germany         |       | BQCV                                | -              |           |
|                                |           |                         | Kyrgyzstan      |       | BQCV                                | -              |           |
|                                |           |                         | Georgia         |       | SBV                                 | -              |           |
|                                |           |                         | Germany         |       | SBV                                 | -              |           |
|                                |           |                         | Kyrgyzstan      |       | SBV                                 | -              |           |
|                                |           |                         | Georgia         |       | DWV                                 | -              |           |
|                                |           |                         | Germany         |       | DWV                                 | -              |           |
|                                |           |                         | Kyrgyzstan      |       | DWV                                 | -              |           |
|                                |           |                         | Georgia         |       | KBV                                 | -              |           |
|                                |           |                         | Germany         |       | KBV                                 | -              |           |
|                                |           |                         | Kyrgyzstan      |       | KBV                                 | -              |           |

|                            |            |                      |                                  |      |                                   |                |               |
|----------------------------|------------|----------------------|----------------------------------|------|-----------------------------------|----------------|---------------|
| <i>Anthophora plumipes</i> | Wild       | Adult                | Georgia<br>Germany<br>Kyrgyzstan | 2014 | SBPV<br>SBPV<br>SBPV              | -<br>-<br>-    | [109]         |
| <i>Bombus</i> spp.         | Wild       | Adult                | France                           | 2021 | ABPV                              | 58.6%          | [100]         |
|                            |            |                      |                                  |      | IAPV                              | 27.6%          |               |
|                            |            |                      |                                  |      | BQCV                              | 14.4%          |               |
|                            |            |                      | U.S.A.                           | 2005 | BQCV <sup>D</sup>                 | 33.3%          | [38]          |
|                            |            |                      | France                           | 2021 | SBV                               | 82.8%          | [100]         |
|                            |            |                      | U.S.A.                           | 2005 | SBV <sup>D</sup>                  | 100%           | [38]          |
|                            |            |                      | France                           | 2021 | DWV                               | 6.89%          | [100]         |
|                            |            |                      | U.S.A.                           | 2005 | DWV <sup>D</sup>                  | 100%           | [38]          |
|                            |            |                      | New Zealand<br>United Kingdom    | 2019 | KBV <sup>D</sup>                  | 100%           | [38]          |
|                            |            |                      |                                  | 2013 | KBV                               | -              | [91]          |
| <i>Bombuis agrorum</i>     | Wild       | Adult                | United Kingdom                   | 1964 | <i>N. ceranae</i><br>ABPV*        | 21.0%<br>-     | [162]<br>[99] |
| <i>Bombus atratus</i>      | Wild       | Adult                | Colombia                         | 2013 | ABPV <sup>E</sup>                 | 11.0%          | [125]         |
|                            |            |                      | Argentina                        | 2011 | BQCV <sup>F</sup>                 | 74.0%          |               |
|                            |            |                      | Colombia                         | 2013 | BQCV <sup>E</sup>                 | 74.0%          | [126]         |
|                            |            |                      |                                  |      | SBV <sup>E</sup>                  | 16.0%          | [125]         |
|                            |            |                      | Argentina                        | 2011 | SBV <sup>F</sup>                  | 100%           | [126]         |
|                            |            |                      | Colombia                         | 2013 | DWV <sup>E</sup>                  | 100%           | [125]         |
|                            |            |                      | Argentina                        | 2011 | DWV <sup>F</sup>                  | 100%           | [126]         |
|                            |            |                      | Colombia                         | 2013 | LSV                               | 68.0%          | [125]         |
|                            |            |                      | Colombia                         | 2013 | <i>N. ceranae</i> <sup>E</sup>    | 100%           |               |
|                            |            |                      | Argentina                        | 2009 | <i>N. ceranae</i>                 | 12.5%          | [160]         |
| <i>Bombus auricomus</i>    | Wild       | Adult                | U.S.A.                           | 2013 | <i>Spiroloplasma apis</i><br>IAPV | 5.00%          | [125]         |
|                            |            |                      |                                  |      | BQCV                              | 3.13%          | [127]         |
|                            |            |                      |                                  |      | SBV                               | 15.6%          |               |
|                            |            |                      |                                  |      | DWV                               | 6.25%          |               |
|                            |            |                      |                                  |      | LSV                               | 62.5%          |               |
| <i>Bombus bimaculatus</i>  | Wild       | Adult                | U.S.A.                           | 2015 | LSV                               | 3.13%          |               |
|                            |            |                      |                                  |      | BQCV*<br>DWV*                     | 65.9%<br>9.30% | [139]         |
| <i>Bombus bellicosus</i>   | Wild       | Adult                | Argentina                        | 2009 | <i>N. ceranae</i>                 | 6.25%          | [160]         |
| <i>Bombus brasiliensis</i> | Wild       | Adult                | Argentina                        | 2015 | <i>N. ceranae</i>                 | 100%           | [161]         |
| <i>Bombus cryptarum</i>    | Wild       | Adult                | Kyrgyzstan                       | 2014 | SBPV                              | -              | [109]         |
| <i>Bombus dahlbomii</i>    | Wild       | Adult                | Chile                            | 2017 | ABPV                              | 7.69%          | [92]          |
|                            |            |                      |                                  |      | BQCV                              | 23.08%         | [92]          |
|                            |            |                      |                                  |      | KBV                               | 3.08%          |               |
|                            |            |                      |                                  |      | CBPV                              | 6.15%          |               |
|                            |            |                      |                                  |      | <i>L. passim</i>                  | 6.15%          |               |
| <i>Bombus funebris</i>     | Wild       | Adult                | Peru                             | 2018 | <i>AmFV</i>                       | 100%           | [147]         |
|                            |            |                      | Bolivia                          |      | <i>L. passim</i>                  | 40.0%          |               |
| <i>Bombus griseocollis</i> | Wild       | Adult                | U.S.A.                           | 2013 | IAPV                              | 12.1%          | [127]         |
|                            |            |                      |                                  |      | BQCV                              | 6.10%          |               |
|                            |            |                      |                                  |      | SBV                               | 51.5%          |               |
|                            |            |                      |                                  |      | DWV                               | 45.5%          |               |
|                            |            |                      |                                  |      | LSV                               | 15.1%          |               |
| <i>Bombus hortorum</i>     | Wild       | Adult                | United Kingdom                   | 1964 | ABPV*                             | -              | [99]          |
|                            |            |                      |                                  | 2014 | ABPV                              | 2.50%          | [110]         |
|                            |            |                      | Slovenia                         | 2018 | ABPV                              | 66.0%          | [213]         |
|                            |            |                      | United Kingdom                   | 2014 | BQCV                              | 11.0%          | [110]         |
|                            |            |                      | Slovenia                         | 2017 | BQCV                              | 100%           | [213]         |
|                            |            |                      | United Kingdom                   | 2014 | SBPV                              | 35.0%          | [110]         |
|                            |            |                      | Slovenia                         | 2018 | SBV                               | 33.0%          | [213]         |
|                            |            |                      | Slovenia                         | 2018 | LSV                               | 33.0%          | [213]         |
|                            |            |                      |                                  | 2008 | Microsporida                      | 42.9%          | [128]         |
|                            |            | Artificial Infection | United Kingdom                   | 2014 | <i>N. ceranae</i>                 | 25.0%          | [83]          |
|                            |            | Wild                 | U.S.A.                           | 2008 | <i>Wolbachia</i> spp.             | 85.7%          | [128]         |
|                            |            |                      |                                  |      | <i>Ascosphaera</i> spp.           | 85.7%          |               |
| <i>Bombus humilis</i>      | Wild       | Adult                | France                           | 2021 | ABPV <sup>G</sup>                 | 100%           | [100]         |
|                            |            |                      |                                  |      | SBV <sup>G</sup>                  | 100%           |               |
|                            |            |                      | Slovenia                         | 2018 | BQCV<br>DWV                       | 100%<br>50.0%  | [213]         |
| <i>Bombus huntii</i>       | Wild       | Adult                | U.S.A.                           | 2011 | BQCV*                             | -              | [211]         |
|                            | Laboratory |                      |                                  |      | BQCV*                             | -              |               |
|                            | Wild       |                      |                                  |      | DWV*                              | -              | [212]         |
|                            | Laboratory |                      |                                  |      | DWV*                              | -              |               |

|                          |                              |       |                |      |                                |       |       |
|--------------------------|------------------------------|-------|----------------|------|--------------------------------|-------|-------|
| <i>Bombus ignitus</i>    | Commercial                   | Adult | Korea          | 2010 | IAPV                           | -     | [116] |
|                          |                              |       |                |      | BQCV                           | -     |       |
|                          |                              |       |                |      | SBV                            | -     |       |
|                          |                              |       |                |      | DWV                            | -     |       |
|                          |                              |       |                |      | KBV                            | -     |       |
|                          |                              |       |                |      | CBPV                           | -     |       |
| <i>Bombus impatiens</i>  | Commercial                   | Adult | Mexico         | 2014 | ABPV                           | 2.00% | [23]  |
|                          |                              |       |                |      | IAPV                           | 2.00% |       |
|                          | Wild                         |       | U.S.A.         | 2011 | IAPV                           | 31.%  | [93]  |
|                          |                              |       |                |      | BQCV <sup>H</sup>              | 60.0% | [38]  |
|                          |                              |       |                |      | BQCV                           | 69.0% | [93]  |
|                          |                              |       |                |      | SBV                            | 23.0% |       |
|                          | Commercial                   |       | Mexico         | 2014 | DWV                            | 2.00% | [23]  |
|                          | Wild                         |       | U.S.A.         | 2005 | DWV <sup>H</sup>               | 100%  | [38]  |
|                          |                              |       |                |      | DWV                            | 62.0% | [93]  |
|                          | Commercial                   |       | Mexico         | 2014 | KBV                            | 2.00% | [23]  |
| <i>Bombus laesus</i>     | Wild                         | Adult | Kyrgyzstan     | 2014 | CBPV                           | 3.34% |       |
|                          |                              |       |                |      | BQCV*                          | -     |       |
| <i>Bombus lapidarius</i> | Wild                         | Adult | United Kingdom | 2014 | ABPV                           | 22.0% | [110] |
|                          |                              |       | Slovenia       | 2017 | ABPV                           | 30.0% | [213] |
|                          |                              |       | United Kingdom | 2014 | BQCV                           | 7.50% | [110] |
|                          |                              |       | Slovenia       | 2017 | BQCV                           | 60.0% | [213] |
|                          |                              |       | Slovenia       | 2018 | BQCV                           | 90.0% | [213] |
|                          |                              |       | United Kingdom | 2014 | DWV* <sup>1</sup>              | 9.14% | [83]  |
|                          |                              |       |                |      | DWV                            | 2.00% | [110] |
|                          |                              |       |                |      | DWV                            | 25.0% | [128] |
|                          |                              |       | Slovenia       | 2017 | DWV                            | 10.0% | [213] |
|                          |                              |       | Belgium        | 2013 | SBPV                           | 3.57% | [112] |
|                          |                              |       | United Kingdom | 2014 | SBPV                           | 1.00% | [110] |
|                          |                              |       | Germany        |      | SBPV                           | -     | [109] |
|                          |                              |       | Kyrgyzstan     |      | SBPV                           | -     |       |
|                          |                              |       | Belgium        | 2013 | LSV                            | 3.57% | [112] |
|                          |                              |       | Slovenia       | 2018 | LSV                            | 9.11% | [213] |
|                          |                              |       | Belgium        | 2013 | VdMLV                          | 3.57% | [112] |
|                          |                              |       | U.S.A.         | 2008 | Microsporidia                  | 50.0% | [128] |
|                          |                              |       | United Kingdom | 2014 | <i>N. ceranae</i> <sup>1</sup> | 9.14% | [83]  |
|                          |                              |       |                |      | <i>Wolbachia</i> spp.          | 75.0% | [128] |
|                          |                              |       | U.S.A.         | 2008 | <i>Wolbachia</i> spp.          | 75.0% | [128] |
|                          |                              |       |                |      | <i>Ascosphaera</i> spp.        | 100%  |       |
| <i>Bombus lucorum</i>    | Wild                         | Adult | United Kingdom | 1964 | ABPV*                          | -     | [99]  |
|                          |                              |       |                | 2014 | ABPV                           | 3.00% | [110] |
|                          | Artificial Infection<br>Wild |       |                |      | BQCV                           | 2.00% | [83]  |
|                          |                              |       |                |      | DWV*                           | 30.0% |       |
|                          |                              |       |                |      | DWV                            | 3.00% | [110] |
|                          |                              |       |                |      | DWV                            | -     | [109] |
|                          |                              |       |                |      | DWV                            | -     |       |
|                          |                              |       |                |      | SBPV                           | 3.00% | [110] |
|                          |                              |       |                |      | SBPV                           | -     | [109] |
|                          |                              |       |                |      | SBPV                           | -     |       |
| <i>Bombus monticola</i>  | Artificial Infection         | Adult | United Kingdom | 2014 | DWV*                           | 100%  | [83]  |
| <i>Bombus morio</i>      | Wild                         | Adult | Argentina      | 2009 | <i>N. ceranae</i>              | 12.5% | [160] |
| <i>Bombus opifex</i>     | Wild                         | Adult | Peru           | 2018 | <i>AmFV</i>                    | 100%  | [147] |
|                          |                              |       | Bolivia        |      | <i>N. ceranae</i>              | 28.6% |       |
|                          |                              |       | Bolivia        |      | <i>L. passim</i>               | 16.7% |       |
| <i>Bombus pascuorum</i>  | Wild                         | Adult | France         | 2021 | ABPV                           | 71.4% | [100] |
|                          |                              |       | United Kingdom | 1964 | ABPV*                          | -     | [99]  |
|                          |                              |       |                | 2014 | ABPV                           | 1.50% | [110] |
|                          |                              |       |                | 2017 | ABPV                           | 7.69% | [213] |
|                          |                              |       | Slovenia       | 2018 | ABPV                           | 3.40% |       |
|                          |                              |       | France         | 2021 | IAPV                           | 14.3% | [100] |
|                          |                              |       | Spain          | 2016 | BQCV                           | 9.40% | [214] |
|                          |                              |       | France         | 2021 | BQCV                           | 14.3% | [100] |
|                          |                              |       | United Kingdom | 2014 | BQCV                           | 5.00% | [110] |
|                          |                              |       |                | 2017 | BQCV                           | 23.1% | [213] |
|                          |                              |       | Slovenia       | 2018 | BQCV                           | 65.5% |       |
|                          |                              |       | France         | 2021 | SBV                            | 100%  | [100] |
|                          |                              |       | Slovenia       | 2017 | SBV                            | 30.8% | [213] |
|                          |                              |       | Slovenia       | 2018 | SBV                            | 48.0% |       |
|                          |                              |       | Spain          | 2016 | DWV                            | 6.30% | [214] |
|                          |                              |       | Germany        | 2004 | DWV                            | 100%  | [69]  |

|                          |                      |       |                |      |                        |        |       |
|--------------------------|----------------------|-------|----------------|------|------------------------|--------|-------|
| <i>Bombus pascuorum</i>  | Artificial Infection | Adult | United Kingdom | 2014 | DWV*                   | 6.67%  | [83]  |
|                          | Wild                 |       | U.S.A.         | 2008 | DWV                    | 5.56%  | [128] |
|                          |                      |       | United Kingdom | 2016 | DWV                    | 30.7%  | [36]  |
|                          |                      |       | Belgium        | 2013 | SBPV                   | 32.5%  | [112] |
|                          |                      |       | United Kingdom | 2014 | SBPV                   | 1.50%  | [110] |
|                          |                      |       | Germany        | 2014 | SBPV                   | -      | [109] |
|                          |                      |       | Belgium        | 2013 | LSV                    | 5.00%  | [112] |
|                          |                      |       | Slovenia       | 2017 | LSV                    | 11.5%  | [213] |
|                          |                      |       | Slovenia       | 2018 | LSV                    | 24.1%  |       |
|                          |                      |       |                |      | VdMLV                  | 16.3%  |       |
|                          |                      |       | U.S.A.         | 2008 | Microsporidia          | 38.9%  | [128] |
|                          |                      |       | United Kingdom | 2016 | <i>N. ceranae</i>      | 12.3%  | [36]  |
|                          |                      |       | U.S.A.         | 2008 | <i>Wolbachia</i> spp.  | 75.0%  | [128] |
|                          |                      |       |                |      | <i>Ascospaera</i> spp. | 22.2%  |       |
| <i>Bombus pauloensis</i> | Wild                 | Adult | Bolivia        | 2018 | <i>AmFV</i>            | 100%   | [147] |
|                          |                      |       | Argentina      |      | CBPV                   | 100%   | [117] |
|                          |                      |       | Bolivia        | 2018 | <i>N. ceranae</i>      | 33.4%  | [147] |
|                          |                      |       | Uruguay        | 2014 | DWV                    | 39.0%  | [215] |
|                          |                      |       |                |      | BQCV                   | 80.9%  |       |
|                          |                      |       |                |      | ABPV                   | 20.0%  |       |
|                          |                      |       |                |      | SBV                    | 27.0%  |       |
| <i>Bombus pratorum</i>   | Wild                 | Adult | Belgium        | 2013 | VdMLV                  | 16.3%  | [112] |
|                          |                      |       |                | 2008 | Microsporidia          | 14.3%  | [128] |
|                          |                      |       |                |      | <i>Wolbachia</i> spp.  | 71.4%  |       |
|                          |                      |       |                |      | <i>Ascospaera</i> spp. | 100%   |       |
| <i>Bombus ruderatus</i>  | Wild                 | Adult | Chile          | 2017 | ABPV                   | 28.97% | [92]  |
|                          |                      |       | France         | 2021 | ABPV                   | 50.0%  | [100] |
|                          |                      |       | Chile          | 2017 | BQCV                   | 22.07% | [92]  |
|                          |                      |       | France         | 2021 | BQCV                   | 50.0%  | [100] |
|                          |                      |       |                |      | SBV                    | 100%   |       |
|                          |                      |       | Chile          | 2017 | DWV                    | 5.52%  | [92]  |
|                          |                      |       | France         | 2021 | DWV                    | 25%    | [100] |
|                          |                      |       | Chile          | 2017 | KBV                    | 2.07%  | [92]  |
|                          |                      |       | Chile          | 2017 | CBPV                   | 2.76%  | [92]  |
|                          |                      |       |                |      | <i>L. passim</i>       | 2.76%  |       |
| <i>Bombus ruderaius</i>  | Wild                 | Adult | United Kingdom | 1964 | ABPV*                  | -      | [99]  |
| <i>Bombus rupestris</i>  | Wild                 | Adult | Germany        | 2014 | BQCV                   | -      | [109] |
| <i>Bombus soroeensis</i> | Wild                 | Adult | Kyrgyzstan     | 2014 | BQCV*                  | -      | [109] |
| <i>Bombus sylvarum</i>   | Wild                 | Adult | Georgia        | 2014 | DWV                    | -      | [109] |
|                          |                      |       | Slovenia       | 2018 | BQCV                   | 91.7%  | [213] |
|                          |                      |       |                |      | SBV                    | 16.7%  |       |
|                          |                      |       |                |      | LSV                    | 8.30%  |       |
| <i>Bombus ternarius</i>  | Wild                 | Adult | U.S.A.         | 2005 | IAPV <sup>†</sup>      | 100%   | [38]  |
|                          |                      |       |                |      | BQCV                   | 50.0%  |       |
|                          |                      |       |                |      | SBV <sup>†</sup>       | 50.0%  |       |
|                          |                      |       |                |      | DWV <sup>†</sup>       | 100%   |       |
| <i>Bombus terrestris</i> | Wild                 | Adult | Chile          | 2017 | ABPV                   | 5.56%  | [92]  |
|                          |                      |       | France         | 2021 | ABPV                   | 72.1%  | [100] |
|                          |                      |       | United Kingdom | 2014 | ABPV                   | 10.0%  | [110] |
|                          |                      |       |                | 1964 | ABPV*                  | -      | [99]  |
|                          |                      |       |                | 2014 | ABPV                   | 6.00%  | [110] |
|                          | Artificial Infection |       | Belgium        | 2014 | IAPV                   | 60.0%  | [216] |
|                          |                      |       |                | 2015 | IAPV                   | -      | [217] |
|                          |                      |       |                |      | IAPV                   | -      | [218] |
|                          |                      |       |                | 2018 | IAPV                   | -      | [219] |
|                          | Wild                 |       | France         | 2021 | IAPV                   | 16.3%  | [100] |
|                          |                      |       | Korea          | 2014 | BQCV                   | 7.09%  | [138] |
|                          |                      |       | Chile          | 2017 | BQCV                   | 33.3%  | [92]  |
|                          |                      |       | France         | 2021 | BQCV                   | 20.9%  | [100] |
|                          |                      |       | United Kingdom | 2014 | BQCV                   | 5.00%  | [110] |
|                          |                      |       | Germany        |      | BQCV*                  | -      | [109] |
|                          |                      |       | Georgia        |      | BQCV*                  | -      |       |
|                          | Commercial           | Adult | Kyrgyzstan     | 2014 | BQCV*                  | -      |       |
|                          | Wild                 |       | France         | 2021 | SBV                    | 95.3%  | [100] |
|                          |                      |       | United Kingdom | 2014 | SBV                    | 2.50%  | [110] |
|                          |                      |       | Korea          | 2010 | SBV                    | -      | [116] |
|                          |                      |       | Korea          | 2014 | DWV                    | 7.09%  | [138] |
|                          |                      |       | Chile          | 2017 | DWV                    | 13.1%  | [92]  |
|                          |                      |       | France         | 2021 | DWV                    | 18.6%  | [100] |

|                             |                      |        |                |      |                         |       |       |
|-----------------------------|----------------------|--------|----------------|------|-------------------------|-------|-------|
| <i>Bombus terrestris</i>    | Wild                 | Adult  | U.S.A.         | 2008 | DWV                     | 29.3% | [128] |
|                             |                      |        | United Kingdom | 2014 | DWV                     | 6.00% | [110] |
|                             |                      |        | United Kingdom | 2016 | DWV                     | 22.3% | [36]  |
|                             | Artificial Infection |        | Germany        | 2014 | DWV*                    | -     | [109] |
|                             |                      |        | Georgia        | 2014 | DWV*                    | -     |       |
|                             |                      |        | Kyrgyzstan     | 2014 | DWV*                    | -     | [109] |
|                             |                      |        | United Kingdom | 2014 | DWV*                    | 5.30% | [83]  |
|                             |                      |        |                | 2015 | DWV                     | 50.0% | [84]  |
|                             |                      |        | Germany        | 2004 | DWV*                    | 100%  | [69]  |
|                             | Commercial           |        | Korea          | 2010 | DWV                     | -     | [116] |
|                             |                      |        | United Kingdom | 2013 | DWV                     | 15.0% | [20]  |
|                             |                      |        |                |      | DWV                     | 15.0% |       |
|                             |                      | Pupae  | Italy          | 2021 | DWV*                    | 100%  | [68]  |
|                             |                      |        | Italy          | 2021 | DWV*                    | 100%  |       |
|                             |                      |        |                |      | DWV*                    | 100%  |       |
|                             |                      |        |                |      | DWV*                    | 100%  |       |
|                             | Artificial Infection | Adult  | U.S.A.         | 2020 | DWV*                    | -     | [55]  |
|                             |                      | Larvae |                |      | DWV*                    | -     |       |
|                             | Artificial Infection | Adult  | Belgium        | 2014 | KBV                     | 100%  | [216] |
|                             |                      |        | Chile          | 2017 | KBV                     | 6.06% | [92]  |
|                             | Commercial           |        |                |      | CBPV                    | 1.52% | [92]  |
|                             |                      |        | Korea          | 2010 | CBPV                    | -     | [116] |
|                             |                      |        | Belgium        | 2015 | SBPV                    | -     | [218] |
|                             | Artificial Infection |        | United Kingdom | 2017 | SBPV                    | 100%  | [111] |
|                             |                      |        | United Kingdom | 2014 | SBPV                    | 6.00% | [110] |
|                             |                      |        | U.S.A.         | 2008 | Microsporidia           | 8.62% | [128] |
|                             | Artificial Infection |        | United Kingdom | 2014 | <i>N. ceranae</i>       | 1.18% | [83]  |
|                             |                      |        |                | 2016 | <i>N. ceranae</i>       | -     | [162] |
|                             |                      |        | United Kingdom | 2016 | <i>N. ceranae</i>       | 38.7% | [36]  |
|                             | Wild                 |        | United Kingdom | 2015 | <i>N. ceranae</i>       | 20.0% | [23]  |
|                             | Commercial           |        | United Kingdom | 2013 | <i>N. apis</i>          | 15.0% | [20]  |
|                             | Wild                 |        | Chile          | 2017 | <i>L. passim</i>        | 4.04% | [92]  |
|                             | Commercial           |        | United Kingdom | 2013 | <i>M. plutonius</i>     | 15.0% | [20]  |
|                             | Wild                 |        | U.S.A.         | 2008 | <i>Wolbachia</i> spp.   | 91.4% | [128] |
|                             |                      |        |                |      | <i>Ascosphaera</i> spp. | 15.5% |       |
|                             |                      |        | Belgium        | 2016 | <i>Ascophaera apis</i>  | -     | [220] |
|                             | Artificial Infection | Larvae |                |      | <i>Ascophaera apis</i>  | -     |       |
|                             | Wild                 | Adult  | U.S.A.         | 2005 | IAPV <sup>K</sup>       | 100%  | [20]  |
|                             |                      |        |                | 2005 | BQCV <sup>K</sup>       | 100%  |       |
|                             |                      |        |                | 2011 | BQCV                    | 100%  | [93]  |
|                             |                      |        |                | 2015 | BQCV*                   | 86.3% | [139] |
|                             |                      |        |                | 2005 | SBV <sup>K</sup>        | 100%  | [38]  |
|                             |                      |        |                | 2011 | SBV                     | 50.0% | [93]  |
|                             |                      |        |                | 2005 | DWV <sup>K</sup>        | 100%  | [38]  |
|                             |                      |        |                | 2011 | DWV                     | 50.0% | [93]  |
|                             |                      |        |                | 2015 | DWV*                    | 9.20% | [139] |
|                             |                      |        |                |      |                         |       |       |
| <i>Bombus vestalis</i>      | Wild                 | Adult  | Germany        | 2014 | BQCV*                   | -     | [109] |
| <i>Bombus ephippiatus</i>   | Wild                 | Adult  | Mexico         | 2020 | DWV                     | 100%  | [221] |
|                             |                      |        |                |      | BQCV                    | 100%  |       |
| <i>Bombus steindachner</i>  | Wild                 | Adult  | Mexico         | 2020 | DWV                     | 100%  | [221] |
| <i>Ceratina dupla</i>       | Wild                 | Adult  | U.S.A.         | 2005 | DWV                     | 66.4% | [38]  |
| <i>Ceratina smaragdula</i>  | Wild                 | Adult  | Hawaii         | 2015 | DWV                     | 27.0% | [222] |
| <i>Eucera</i> spp.          | Wild                 | Adult  | France         | 2021 | ABPV                    | 22.%  | [100] |
|                             |                      |        |                |      | IAPV                    | 77.8% |       |
|                             |                      |        |                |      | BQCV                    | 66.7% |       |
|                             |                      |        |                |      | SBV                     | 55.6% |       |
|                             |                      |        |                |      | DWV                     | 11.1% |       |
| <i>Eucera nigrescens</i>    | Wild                 | Adult  | Georgia        | 2014 | ABPV <sup>L</sup>       | 100%  | [109] |
|                             |                      |        |                |      | IAPV <sup>L</sup>       | 100%  |       |
|                             |                      |        |                |      | BQCV <sup>L</sup>       | 100%  |       |
|                             |                      |        |                |      | SBV <sup>L</sup>        | 100%  |       |
|                             |                      |        |                |      | DWV <sup>L</sup>        | 100%  |       |
|                             |                      |        |                |      | KBV <sup>L</sup>        | 100%  |       |
|                             |                      |        |                |      | SBPV <sup>L</sup>       | 100%  |       |
| <i>Melecta albifrons</i>    | Wild                 | Adult  | Germany        | 2014 | SBPV                    | -     | [109] |
|                             |                      |        | Georgia        |      | SBPV                    | -     |       |
| <i>Melipona fasciculata</i> | Wild                 | Adult  | Brasil         | 2015 | <i>N. ceranae</i>       | 100%  | [163] |
| <i>Melipona mandacaia</i>   | Wild                 | Adult  | Brasil         | 2015 | <i>N. ceranae</i>       | 100%  | [163] |
| <i>Melipona marginate</i>   | Wild                 | Adult  | Brasil         | 2015 | <i>N. ceranae</i>       | 100%  | [163] |

|                                     |                      |        |            |                  |                   |       |       |
|-------------------------------------|----------------------|--------|------------|------------------|-------------------|-------|-------|
| Melipona quadrifasciata anthidiodes | Wild                 | Adult  | Brasil     | 2015             | N. ceranae        | 100%  | [163] |
| Melipona rufiventris                | Wild                 | Adult  | Brasil     | 2015             | N. ceranae        | 100%  | [163] |
| Melipona scutellaris                | Wild                 | Adult  | Brasil     | 2015             | ABPV              | 100%  | [223] |
| Melipona colimana                   | Wild                 | Adult  | Mexico     | 2019             | DWV               | 33.3% | [221] |
|                                     |                      |        |            | 2020             | DWV               | 50.0% | [224] |
|                                     |                      |        |            | 2019             | BQCV              | 100%  | [221] |
|                                     |                      |        |            | 2020             | BQCV              | 50.0% | [224] |
| Melissodes bimaculata               | Wild                 | Adult  | U.S.A.     | 2013             | IAPV              | 20.0% | [127] |
|                                     |                      |        |            | SBV              | 80.0%             |       |       |
|                                     |                      |        |            | DWV              | 60.0%             |       |       |
|                                     |                      |        |            | LSV              | 10.0%             |       |       |
| Nomada distinguenda                 | Wild                 | Adult  | France     | 2021             | ABPV <sup>M</sup> | 100%  | [100] |
|                                     |                      |        |            |                  | IAPV <sup>M</sup> | 100%  |       |
|                                     |                      |        |            |                  | BQCV <sup>M</sup> | 50.0% |       |
|                                     |                      |        |            |                  | SBV <sup>M</sup>  | 50.0% |       |
| Peponapis fervens                   | Wild                 | Adult  | Argentina  | 2018             | CBPV              | 100%  | [117] |
| Plebeia emerinoïdes                 | Wild                 | Adult  | Argentina  | 2017             | IAPV              | 12.5% | [101] |
| Plebeia droryana                    | Wild                 | Adult  | Argentina  | 2017             | IAPV              | 20.0% | [101] |
| Scaptotrigona jujuyensis            | Wild                 | Adult  | Argentina  | 2015             | N. ceranae        | 100%  | [163] |
| Scaptotrigona mexicana              | Wild                 | Adult  | Mexico     | 2015             | DWV               | 60.0% | [225] |
|                                     |                      |        |            | 2020             | DWV               | 60.0% | [221] |
|                                     |                      |        |            | BQCV             | 40.0%             |       |       |
| Tetragonisca fiebrigi               | Wild                 | Adult  | Argentina  | 2017             | IAPV              | 3.70% | [101] |
|                                     |                      |        |            | 2014             | DWV               | 48.1% | [163] |
|                                     |                      |        |            | 2015             | N. ceranae        | 100%  |       |
|                                     |                      |        |            |                  | N. ceranae        | 100%  |       |
| Trigona spinipes                    | Wild                 | Adult  | Argentina  | 2017             | IAPV              | 25.0% | [101] |
| Trigona fulviventris                | Wild                 | Adult  | Mexico     | 2020             | DWV               | 100%  | [221] |
| Nannotrigona perilapodes            | Wild                 | Adult  | Mexico     | 2020             | DWV               | 100%  | [221] |
| Tetragonula hockingsi               | Artificial Infection | Adult  | Australia  | 2019             | N. ceranae        | 67.0% | [226] |
| Xylocopa atamisquensis              | Wild                 | Adult  | Argentina  | 2018             | CBPV              | 50.0% | [117] |
| Xylocopa augusti                    | Laboratory           | Larvae | Argentina  | 2013             | DWV               | 30.0% | [85]  |
|                                     | Wild                 | Adult  |            | 2018             | CBPV              | 87.5% | [117] |
| Xylocopa dissimilis                 | Wild                 | Adult  | Kyrgyzstan | 2014             | CBPV              | -     | [109] |
| Xylocopa iris                       | Wild                 | Adult  | France     | 2021             | ABPV <sup>N</sup> | 100%  | [100] |
|                                     |                      |        |            |                  | BQCV <sup>N</sup> | 100%  |       |
| Xylocopa nigrocinta                 | Wild                 | Adult  | Argentina  | 2018             | CBPV              | 66.7% | [117] |
| Xylocopa violacea                   | Wild                 | Adult  | France     | 2021             | ABPV <sup>o</sup> | 100%  | [100] |
|                                     |                      |        |            |                  | BQCV <sup>o</sup> | 100%  |       |
|                                     |                      |        |            |                  | SBV <sup>o</sup>  | 100%  |       |
|                                     |                      |        |            |                  | DWV <sup>o</sup>  | 100%  |       |
| Xylocopa virginica                  | Wild                 | Adult  | U.S.A.     | 2005             | BQCV <sup>P</sup> | 50.0% | [38]  |
|                                     |                      |        |            | 2011             | BQCV              | 100%  | [93]  |
|                                     |                      |        |            | 2005             | SBV               | 100%  |       |
|                                     |                      |        |            |                  | DWV <sup>P</sup>  | 75.0% |       |
| <u>Colletidae</u>                   |                      |        |            |                  |                   |       |       |
| Colletes spp.                       | Wild                 | Adult  | Mexico     | 2020             | DWV               | 100%  | [221] |
|                                     |                      |        |            |                  | BQCV              | 100%  | [221] |
| Hylaeus dilatatus                   | Wild                 | Adult  | France     | 2021             | ABPV              | 20.0% | [100] |
|                                     |                      |        |            |                  | IAPV              | 40.0% |       |
| <u>Halictidae</u>                   |                      |        |            |                  |                   |       |       |
| Agapostemon viriscens               | Wild                 | Adult  | U.S.A.     | 2013             | IAPV              | 55.3% | [127] |
|                                     |                      |        |            |                  | SBV               | 41.7% |       |
|                                     |                      |        |            |                  | DWV               | 66.7% |       |
|                                     |                      |        |            |                  | LSV               | 5.26% |       |
| Augochlora pura                     | Wild                 | Adult  | U.S.A.     | 2005             | IAPV <sup>Q</sup> | 100%  | [38]  |
|                                     |                      |        |            | 2013             | DWV <sup>Q</sup>  | 100%  | [127] |
|                                     |                      |        |            |                  | BQCV              | 16.7% |       |
| Augochlorella auratus               | Wild                 | Adult  | U.S.A.     | 2013             | SBV               | 100%  | [127] |
|                                     |                      |        |            |                  | LSV               | 33.3% |       |
| Halictus spp.                       | Wild                 | Adult  | France     | 2021             | ABPV              | 75.0% | [100] |
|                                     |                      |        |            |                  | IAPV              | 25.0% |       |
|                                     |                      |        |            |                  | BQCV              | 25.0% |       |
|                                     |                      |        |            |                  | SBV               | 25.0% |       |
|                                     |                      |        |            |                  | DWV               | 50.0% |       |
|                                     |                      |        | U.S.A.     | 2011             | DWV               | 25.0% | [93]  |
|                                     |                      |        |            | 2008             | Wolbachia spp.    | 70.0% | [128] |
|                                     |                      |        |            | Ascosphaera spp. | 70.0%             |       |       |
| Halictus fulvipes                   | Wild                 | Adult  | France     | 2021             | ABPV              | 58.8% | [100] |

|                                     |                      |       |            |      |                                                                                 |                                           |                |
|-------------------------------------|----------------------|-------|------------|------|---------------------------------------------------------------------------------|-------------------------------------------|----------------|
| <i>Halictus fulvipes</i>            | Wild                 | Adult | France     | 2021 | BQCV<br>SBV                                                                     | 11.8%<br>29.4%                            | [100]          |
| <i>Halictus ligatus</i>             | Wild                 | Adult | U.S.A.     | 2013 | IAPV<br>BQCV<br>SBV<br>DWV<br>LSV                                               | 3.13%<br>15.6%<br>6.25%<br>62.5%<br>3.13% | [127]          |
| <i>Halictus maculatus</i>           | Wild                 | Adult | France     | 2021 | IAPV                                                                            | 100%                                      | [100]          |
| <i>Halictus patellatus</i>          | Wild                 | Adult | France     | 2021 | ABPV                                                                            | 100%                                      | [100]          |
| <i>Halictus parallelum</i>          | Wild                 | Adult | U.S.A.     | 2013 | IAPV<br>BQCV<br>SBV<br>DWV                                                      | 3.13%<br>15.6%<br>6.25%<br>62.5%          | [127]          |
|                                     |                      |       | Georgia    | 2014 | CBPV                                                                            | -                                         | [109]          |
|                                     |                      |       | Kyrgyzstan |      | CBPV                                                                            | -                                         |                |
|                                     |                      |       | U.S.A.     | 2013 | LSV                                                                             | 3.13%                                     | [127]          |
| <i>Halictus rubicundus</i>          | Wild                 | Adult | U.S.A.     | 2013 | IAPV<br>BQCV<br>SBV<br>DWV<br>LSV                                               | 3.13%<br>15.6%<br>6.25%<br>62.5%<br>3.13% | [127]          |
| <i>Halictus simplex</i>             | Wild                 | Adult | France     | 2021 | BQCV                                                                            | 100%                                      | [100]          |
| <i>Halictus tectus</i>              | Wild                 | Adult | France     | 2021 | BQCV<br>SBV                                                                     | 50.0%<br>25.0%                            | [100]<br>[100] |
| <i>Halictus ligatus</i>             | Artificial Infection | Adult | U.S.A.     | 2020 | <i>C. bombi</i><br><i>C. mellificae</i>                                         | -<br>-                                    | [203]          |
| <i>Halictillus amplilobus</i>       | Wild                 | Adult | Argentina  | 2018 | CBPV                                                                            | 100%                                      | [117]          |
| <i>Lasioglossum</i> spp.            | Wild                 | Adult | U.S.A.     | 2008 | Microsporidia<br><i>Wolbachia</i> spp.<br><i>Ascospaera</i> spp.                | 2.22%<br>40.0%<br>51.1%                   | [128]          |
| <i>Lasioglossum crassepunctatum</i> | Wild                 | Adult | France     | 2021 | ABPV <sup>R</sup><br>IAPV <sup>R</sup><br>BQCV <sup>R</sup><br>SBV <sup>R</sup> | 100%<br>100%<br>100%<br>100%              | [100]          |
| <i>Lasioglossum dialectus</i>       | Wild                 | Adult | U.S.A.     | 2013 | IAPV<br>BQCV<br>SBV<br>DWV<br>LSV                                               | 3.13%<br>15.6%<br>6.25%<br>62.5%<br>3.13% | [127]          |
| <i>Lasioglossum malachurum</i>      | Wild                 | Adult | France     | 2021 | ABPV<br>IAPV<br>BQCV<br>SBV                                                     | 26.2%<br>33.8%<br>53.8%<br>43.1%          | [100]          |
| <i>Lasioglossum nigripes</i>        | Wild                 | Adult | France     | 2021 | BQCV                                                                            | 100%                                      | [100]          |
| <i>Lasioglossum pauperatum</i>      | Wild                 | Adult | France     | 2021 | IAPV<br>BQCV<br>SBV                                                             | 16.7%<br>33.4%<br>33.4%                   | [100]          |
| <i>Lasioglossum pauxillum</i>       | Wild                 | Adult | France     | 2021 | BQCV<br>SBV<br>DWV                                                              | 100%<br>33.4%<br>33.4%                    | [100]          |
| <b>Megachilidae</b>                 |                      |       |            |      |                                                                                 |                                           |                |
| <i>Anthidium manicatum</i>          | Wild                 | Adult | France     | 2021 | ABPV <sup>S</sup><br>IAPV <sup>S</sup>                                          | 100%<br>100%                              | [100]          |
| <i>Heriades truncorum</i>           | Wild                 | Adult | Belgium    | 2012 | BQCV <sup>T</sup><br><i>N. ceranae</i><br><i>Apicystis bombi</i> <sup>T</sup>   | 66.7%%<br>100%<br>33.3%                   | [37]           |
| <i>Hoplitis adunca</i>              | Wild                 | Adult | France     | 2021 | IAPV <sup>U</sup><br>BQCV <sup>U</sup><br>SBV <sup>U</sup>                      | 100%<br>100%<br>100%                      | [100]          |
| <i>Megachile albisecta</i>          | Wild                 | Adult | France     | 2021 | SBV                                                                             | 100%                                      | [100]          |
| <i>Megachile brevis</i>             | Wild                 | Adult | U.S.A.     | 2013 | IAPV<br>SBV<br>DWV                                                              | 11.7%<br>70.6%<br>52.9%                   | [127]          |
| <i>Megachile brevis</i>             | Wild                 | Adult | U.S.A.     | 2013 | LSV                                                                             | 17.6%                                     | [127]          |
| <i>Megachile rotundata</i>          | Wild                 | Adult | Canada     | 2013 | SBV<br>DWV                                                                      | 56.0%<br>48.0%                            | [100]          |
|                                     | Artificial Infection |       | U.S.A.     | 2021 | <i>C. bombi</i>                                                                 | 59.0%                                     | [202]          |
|                                     |                      |       |            | 2020 | <i>C. bombi</i>                                                                 | -                                         | [203]          |

|                                      |                      |       |             |      |                                      |       |       |
|--------------------------------------|----------------------|-------|-------------|------|--------------------------------------|-------|-------|
| <i>Osmia bicornis</i>                | Wild                 | Adult | Georgia     | 2014 | ABPV                                 | -     | [109] |
|                                      |                      |       | Germany     |      | ABPV                                 | -     |       |
|                                      |                      |       | Kyrgyzstan  |      | ABPV                                 | -     |       |
|                                      |                      |       | Georgia     |      | IAPV                                 | -     |       |
|                                      |                      |       | Germany     |      | IAPV                                 | -     |       |
|                                      |                      |       | Kyrgyzstan  |      | IAPV                                 | -     |       |
|                                      |                      |       | Georgia     |      | BQCV                                 | -     |       |
|                                      |                      |       | Germany     |      | BQCV                                 | -     |       |
|                                      |                      |       | Kyrgyzstan  |      | BQCV                                 | -     |       |
|                                      |                      |       | Georgia     |      | SBV                                  | -     |       |
|                                      |                      |       | Germany     |      | SBV                                  | -     |       |
|                                      |                      |       | Kyrgyzstan  |      | SBV                                  | -     |       |
|                                      |                      |       | Belgium     |      | DWV <sup>v</sup>                     | 100%  | [37]  |
|                                      |                      |       | Georgia     |      | DWV                                  | -     | [109] |
|                                      |                      |       | Germany     |      | DWV                                  | -     |       |
|                                      |                      |       | Kyrgyzstan  |      | DWV                                  | -     |       |
|                                      |                      |       | Georgia     |      | KBV                                  | -     |       |
|                                      |                      |       | Germany     |      | KBV                                  | -     |       |
|                                      |                      |       | Kyrgyzstan  |      | KBV                                  | -     |       |
|                                      |                      |       | Georgia     |      | SBPV                                 | -     |       |
|                                      |                      |       | Germany     |      | SBPV                                 | -     |       |
|                                      |                      |       | Kyrgyzstan  |      | SBPV                                 | -     |       |
|                                      |                      |       | Belgium     | 2012 | LSV <sup>v</sup>                     | 100%  | [84]  |
|                                      |                      |       |             |      | <i>AmFV</i> <sup>v</sup>             | 100%  |       |
|                                      |                      |       |             |      | <i>N. ceranae</i> <sup>v</sup>       | 100%  |       |
|                                      |                      |       |             |      | <i>C. bombi</i>                      | 100%  |       |
|                                      |                      |       |             |      | <i>S. apis</i>                       | 33.3% |       |
|                                      |                      |       |             |      | <i>S. melliferum</i>                 | 66.7% |       |
|                                      |                      |       |             |      | <i>Ascosphaera</i> spp. <sup>v</sup> | 100%  |       |
|                                      |                      |       |             |      | <i>Apicystis bombi</i> <sup>v</sup>  | 100%  |       |
| <i>Osmia cornuta</i>                 | Wild                 | Adult | Belgium     | 2012 | BQCV <sup>w</sup>                    | 100%  | [84]  |
|                                      | Artificial Infection |       | Italy       | 2014 | DWV*                                 | 3.43% | [40]  |
|                                      | Wild                 |       | Georgia     |      | DWV                                  | 100%  | [109] |
|                                      |                      |       | Belgium     | 2012 | LSV <sup>w</sup>                     | 100%  | [84]  |
|                                      |                      |       |             |      | LSV*                                 | 100%  | [227] |
|                                      |                      |       |             |      | <i>AmFV</i> <sup>w</sup>             | 100%  | [84]  |
|                                      |                      |       | Belgium     | 2012 | <i>N. ceranae</i> <sup>w</sup>       | 100%  |       |
|                                      |                      |       |             |      | <i>Ascoshpaera</i> spp. <sup>w</sup> | 100%  |       |
|                                      |                      |       |             |      | <i>Apicystis bombi</i> <sup>w</sup>  | 100%  |       |
| <i>Osmia lignaria</i>                | Artificial Infection | Adult | U.S.A.      | 2021 | <i>C. bombi</i>                      | 29.0% | [202] |
|                                      |                      |       |             | 2020 |                                      | -     | [203] |
|                                      |                      |       |             | 2020 | <i>C. mellifica</i>                  | -     | [203] |
| <b>WASP</b>                          |                      |       |             |      |                                      |       |       |
| <u>Bembicidae</u>                    |                      |       |             |      |                                      |       |       |
| <i>Bembix</i> spp.                   | Wild                 | Adult | U.S.A.      | 2005 | BQCV <sup>x</sup>                    | 100%  | [38]  |
|                                      |                      |       |             | 2005 | DWV <sup>x</sup>                     | 100%  |       |
| <u>Cryptinae</u>                     |                      |       |             |      |                                      |       |       |
| <i>Xanthocryptus novozealandicus</i> | Wild                 | Adult | New Zealand | 2019 | DWV                                  | 100%  | [91]  |
| <u>Pompilidae</u>                    |                      |       |             |      |                                      |       |       |
| <i>Sphictostethus nitidus</i>        | Wild                 | Adult | New Zealand | 2019 | DWV                                  | 100%  | [91]  |
| <u>Vespidae</u>                      |                      |       |             |      |                                      |       |       |
| <i>Ancistrocerus auctus</i>          | Wild                 | Adult | France      | 2021 | ABPV <sup>y</sup>                    | 100%  | [100] |
|                                      |                      |       |             |      | SBV <sup>y</sup>                     | 100%  |       |
| <i>Dolichovespula sylvestris</i>     | Wild                 | Adult | U.S.A.      | 2008 | <i>Wolbachia</i> spp.                | 100%  | [128] |
| <i>Polybia scutellaris</i>           | Wild                 | Adult | Argentina   | 2010 | <i>N. ceranae</i>                    | 100%  | [163] |
| <i>Polistes</i> spp.                 | Wild                 | Adult | France      | 2021 | ABPV <sup>z</sup>                    | 100%  | [100] |
|                                      |                      |       |             |      | BQCV <sup>z</sup>                    | 100%  |       |
|                                      |                      |       |             |      | DWV <sup>z</sup>                     | 100%  |       |
| <i>Polistes arifer</i>               | Wild                 | Adult | Hawaii      | 2015 | DWV                                  | 45.0% | [222] |
|                                      |                      |       |             |      |                                      |       |       |
| <i>Polistes chinensis</i>            | Wild                 | Adult | New Zealand | 2019 | DWV                                  | -     | [91]  |
|                                      |                      |       |             |      | Moku virus*                          | -     | [91]  |
| <i>Polistes domicula</i>             | Wild                 | Adult | France      | 2021 | ABPV                                 | 20.0% | [100] |
|                                      |                      |       |             |      | BQCV                                 | 20.0% |       |
|                                      |                      |       |             |      | SBV                                  | 20.0% |       |
|                                      |                      |       |             |      | DWV                                  | 20.0% |       |
| <i>Polistes fuscatus</i>             | Wild                 | Adult | U.S.A.      | 2005 | DWV                                  | 16.7% | [38]  |
| <i>Polistes humilis</i>              | Wild                 | Adult | New Zealand | 2019 | Moku virus                           | -     | [91]  |



|                                   |                      |        |                |      |                                                                                                                                    |                                                             |                         |
|-----------------------------------|----------------------|--------|----------------|------|------------------------------------------------------------------------------------------------------------------------------------|-------------------------------------------------------------|-------------------------|
| <i>Polistes metricus</i>          | Wild                 | Adult  | U.S.A.         | 2005 | BQCV <sup>1</sup><br>SBV <sup>1,2</sup><br>DWV <sup>1</sup>                                                                        | 25.0%<br>50.0%<br>50.0%                                     | [38]                    |
| <i>Polistes ninpha</i>            | Wild                 | Adult  | France         | 2021 | ABPV                                                                                                                               | 100%                                                        | [100]                   |
| <i>Vespa crabro</i>               | Wild                 | Adult  | Italy          | 2016 | DWV*                                                                                                                               | 100%                                                        | [45]                    |
|                                   |                      |        | Spain          | 2016 | <i>N. ceranae</i><br><i>N. thompsoni</i><br><i>C. bombi</i><br><i>C. mellificae</i><br><i>L. passim</i><br><i>A. bombi</i>         | 3.20%<br>9.70%<br>12.9%<br>3.2%<br>16.1%<br>29.0%           | [228]                   |
| <i>Vespa velutina nigrithorax</i> | Wild                 | Adult  | China          | 2011 | IAPV*                                                                                                                              | 100%                                                        | [48]                    |
|                                   |                      |        | Italy          | 2017 | BQCV*<br>DWV*                                                                                                                      | 50.0%<br>75.0%                                              | [46]<br>[47]            |
|                                   |                      |        |                | 2018 |                                                                                                                                    | 100%                                                        | [229]                   |
|                                   |                      |        | Spain          | 2016 | KBV*<br><i>N. ceranae</i><br><i>N. thompsoni</i><br><i>C. bombi</i><br><i>C. mellificae</i><br><i>L. passim</i><br><i>A. bombi</i> | 8.34%<br>2.50%<br>11.4%<br>17.7%<br>8.90%<br>3.80%<br>17.7% | [46]<br>[228]           |
|                                   |                      |        | Belgium        | 2016 | Moku virus                                                                                                                         | 100%                                                        | [151]                   |
| <i>Vespula</i> spp.               | Wild                 | Adult  | U.S.A.         | 2011 | BQCV<br>SBV<br>DWV                                                                                                                 | 29.0%<br>14.0%<br>57.0%                                     | [93]                    |
| <i>Vespula germanica</i>          | Wild                 | Adult  | United Kingdom | 2018 | ABPV                                                                                                                               | 31.3%                                                       | [94]                    |
|                                   |                      |        | France         |      | IAPV                                                                                                                               | 3.23%                                                       |                         |
|                                   |                      |        | New Zealand    |      | DWV                                                                                                                                | 24.2%                                                       |                         |
|                                   |                      |        | Germany        |      | DWV                                                                                                                                | 9.68%                                                       |                         |
|                                   |                      |        | U.S.A.         | 2008 | DWV                                                                                                                                | 25.0%                                                       | [128]                   |
|                                   |                      |        | New Zealand    | 2019 | DWV* <sup>3</sup>                                                                                                                  | 100%                                                        | [91]                    |
|                                   |                      |        |                | 2018 | KBV                                                                                                                                | 15.1%                                                       | [94]                    |
|                                   |                      |        |                | 2019 | KBV <sup>3</sup>                                                                                                                   | 100%                                                        | [91]                    |
|                                   |                      |        | United Kingdom | 2018 | KBV                                                                                                                                | 6.25%                                                       | [94]                    |
|                                   |                      |        | New Zealand    | 2019 | Moku virus * <sup>3</sup>                                                                                                          | 100%                                                        | [91]                    |
|                                   |                      |        | U.S.A.         | 2008 | <i>Wolbachia</i> spp.<br><i>Ascospaera</i> spp.                                                                                    | 25.0%<br>25.0%                                              | [128]                   |
| <i>Vespula pensylvanica</i>       | Wild                 | Adult  | Hawaii         | 2012 | DWV<br>DWV<br>Moku virus<br>Moku virus                                                                                             | 100%<br>-<br>-<br>100%                                      | [150]<br>[130]<br>[150] |
| <i>Vespula vulgaris</i>           | Wild                 | Adult  | U.S.A.         | 2005 | IAPV <sup>4</sup><br>BQCV <sup>4,5</sup>                                                                                           | 41.7%<br>66.7%                                              | [38]<br>[38]            |
|                                   |                      |        |                | 2008 | BQCV                                                                                                                               | 2.10%                                                       | [128]                   |
|                                   |                      |        |                | 2005 | SBV <sup>4</sup>                                                                                                                   | 33.3%                                                       | [38]                    |
|                                   |                      |        |                | 2008 | SBV                                                                                                                                | 2.10%                                                       | [128]                   |
|                                   |                      |        |                | 2005 | DWV <sup>4,5</sup>                                                                                                                 | 91.7%                                                       | [38]                    |
|                                   |                      |        |                | 2008 | DWV                                                                                                                                | 29.2%                                                       | [128]                   |
|                                   |                      |        | New Zealand    | 2019 | DWV*<br>KBV*                                                                                                                       | <br>-                                                       | [91]                    |
|                                   |                      | Larvae |                | 2016 | KBV                                                                                                                                | 100%                                                        | [95]                    |
|                                   | Artificial Infection |        |                |      | KBV                                                                                                                                | 100%                                                        |                         |
|                                   | Wild                 | Adult  |                | 2019 | Moku virus*                                                                                                                        | -                                                           | [91]                    |
|                                   |                      | Larvae |                | 2016 | Moku virus                                                                                                                         | 100%                                                        | [95]                    |
|                                   | Artificial Infection |        |                |      | Moku virus                                                                                                                         | 100%                                                        |                         |
|                                   | Wild                 | Adult  | U.S.A.         | 2008 | Microsporidia<br><i>Wolbachia</i> spp.<br><i>Ascospaera</i> spp.                                                                   | 15.5%<br>35.4%<br>54.2%                                     | [128]                   |
| <u>Scolidae</u>                   |                      |        |                |      |                                                                                                                                    |                                                             |                         |
| <i>Scolia flavifrons</i>          | Wild                 | Adult  | France         | 2021 | ABPV <sup>6</sup><br>BQCV <sup>6</sup><br>SBV <sup>6</sup><br>DWV <sup>6</sup>                                                     | 50.0%<br>100%<br>50.0%<br>50.0%                             | [100]                   |
| <b>ANT</b>                        |                      |        |                |      |                                                                                                                                    |                                                             |                         |
| <u>Formicidae</u>                 |                      |        |                |      |                                                                                                                                    |                                                             |                         |
| <i>Anoplolepis gracilipes</i>     | Wild                 | Adult  | Australia      | 2016 | BQCV                                                                                                                               | -                                                           | [51]                    |
|                                   |                      |        | Japan          | 2019 | DWV                                                                                                                                | 3.40%                                                       | [230]                   |
|                                   |                      |        | Solomon Island |      | DWV                                                                                                                                | 100%                                                        |                         |
|                                   |                      |        | Vanatu         |      | DWV                                                                                                                                | 50.0%                                                       |                         |

|                                 |                      |       |             |      |                            |                                  |       |
|---------------------------------|----------------------|-------|-------------|------|----------------------------|----------------------------------|-------|
| <i>Camponotus</i> spp.          | Wild                 | Adult | U.S.A.      | 2011 | IAPV<br>BQCV<br>SBV<br>DWV | 6.00%<br>24.0%<br>24.0%<br>6.00% | [93]  |
| <i>Camponotus vagus</i>         | Wild                 | Adult | France      | 2008 | CBPV*<br>CBPV*             | 100%<br>10.0%                    | [118] |
| <i>Formica rufa</i>             | Wild                 | Adult | France      | 2008 | CBPV*                      | 10.0%                            | [118] |
| <i>Linepithema humile</i>       | Wild                 | Adult | New Zealand | 2015 | ABPV<br>IAPV               | -<br>-                           | [49]  |
|                                 |                      |       |             | 2013 | DWV*                       | 7.00%                            | [50]  |
|                                 |                      |       |             | 2019 | DWV*                       | -                                | [91]  |
|                                 |                      |       |             |      | KBV*                       | -                                | [91]  |
|                                 |                      |       |             | 2015 | KBV                        | -                                | [49]  |
|                                 |                      |       |             | 2019 | Moku virus*                | -                                | [91]  |
| <i>Paratrechina longicornis</i> | Wild                 | Adult | Japan       | 2019 | DWV                        | 15.4%                            | [230] |
|                                 |                      |       | Taiwan      |      | DWV                        | 4.60%                            |       |
|                                 |                      |       | Malaysia    |      | DWV                        | 13.6%                            |       |
|                                 |                      |       | China       |      | DWV                        | 26.7%                            |       |
|                                 |                      |       | Fiji        |      | DWV                        | 33.3%                            |       |
| <i>Pheidole megacephala</i>     | Wild                 | Adult | Hawaii      | 2012 | DWV                        | -                                | [130] |
| <i>Tapinoma melanocephalum</i>  | Wild                 | Adult | Hawaii      | 2012 | DWV                        | -                                | [130] |
| <b><u>Myrmicinae</u></b>        |                      |       |             |      |                            |                                  |       |
| <i>Myrmica rubra</i>            | Artificial Infection | Adult | Switzerland | 2019 | DWV                        | -                                | [231] |

Legend: Bold and underlined taxon indicates the taxonomic group; Underlined taxon indicates the family; -: no calculated; \*: replicative virus; superscript “A”-“Z” and “1”-“6”: indicate the coinfection reported in the same study; ABPV: Acute Bee Paralysis Virus; IAPV: Israeli Acute Paralysis Virus; BQCV: Black Queen Cell Virus; SBV: Sacbrood Virus; DWV: Deforming Wing Virus; LSV: Lake Sani Virus; AmFV: *Apis mellifera* Filamentous Virus; KBV: Kashmir Bee Virus; SBPV: Slow Bee Paralysis Virus; CBPV: Chronic Bee Paralysis Virus; VdMLV: *Varroa destructor* Macula-like Virus.

**Table S2.** Bee pathogen spillover and prevalence identified in arthropod hosts, of which are reported condition, stage, geographical are and year.

| Host                            |                                            |       | Geographic area | Year | Pathogen                                                          | Prevalence (%)           | Reference |       |
|---------------------------------|--------------------------------------------|-------|-----------------|------|-------------------------------------------------------------------|--------------------------|-----------|-------|
| Taxon                           | Condition                                  | Stage |                 |      |                                                                   |                          |           |       |
| <b>FLY</b>                      |                                            |       |                 |      |                                                                   |                          |           |       |
| <u>Calliphoridae</u>            |                                            |       |                 |      |                                                                   |                          |           |       |
| Undetermined Calliphoridae      | Wild                                       | Adult | U.S.A.          | 2011 | DWV                                                               | 25.0%                    | [93]      |       |
| <u>Muscidae</u>                 |                                            |       |                 |      |                                                                   |                          |           |       |
| <i>Musca</i> spp.               | Wild                                       | Adult | U.S.A.          | 2011 | DWV                                                               | 50.0%                    | [93]      |       |
| <u>Syrphidae</u>                |                                            |       |                 |      |                                                                   |                          |           |       |
| <i>Episyrphus balteatus</i>     | Wild                                       | Adult | U.S.A.          | 2008 | <i>Wolbachia</i> spp.<br><i>Ascosphaera</i> spp.                  | 76.9%<br>69.2%           | [128]     |       |
| <i>Eristalis arbustorum</i>     | Wild                                       | Adult | United Kingdom  | 2016 | BQCV<br>SBV<br>DWV                                                | 10.0%<br>5.00%<br>5.00%  | [129]     |       |
|                                 |                                            |       | U.S.A.          | 2008 | <i>Wolbachia</i> spp.<br><i>Ascosphaera</i> spp.                  | 72.7%<br>90.9%           |           |       |
|                                 |                                            |       | United Kingdom  | 2016 | BQCV<br>SBV                                                       | 10.0%<br>20.0%           |           |       |
| <i>Eristalis tenax</i>          | Wild                                       | Adult | U.S.A.          | 2008 | Microsporidia<br><i>Wolbachia</i> spp.<br><i>Ascosphaera</i> spp. | 9.10%<br>45.5%<br>36.42% | [128]     |       |
|                                 |                                            |       | United Kingdom  | 2016 | BQCV<br>SBV                                                       | 10.0%<br>20.0%           |           |       |
|                                 |                                            |       | U.S.A.          | 2008 | Microsporidia<br><i>Wolbachia</i> spp.<br><i>Ascosphaera</i> spp. | 9.10%<br>45.5%<br>36.42% |           |       |
| <i>Rhingia campestris</i>       | Wild                                       | Adult | U.S.A.          | 2008 | <i>Wolbachia</i> spp.<br><i>Ascosphaera</i> spp.                  | 41.7%<br>16.7%           | [128]     |       |
|                                 |                                            |       |                 |      |                                                                   |                          |           |       |
| <u>Tipulidae</u>                |                                            |       |                 |      |                                                                   |                          |           |       |
| <i>Leptotarus</i> spp.          | Wild                                       | Adult | New Zealand     | 2019 | DWV                                                               | -                        | [91]      |       |
| <b>BEETLE</b>                   |                                            |       |                 |      |                                                                   |                          |           |       |
| <u>Coccinellidae</u>            |                                            |       |                 |      |                                                                   |                          |           |       |
| <i>Harmonia axyridis</i>        | Wild                                       | Adult | U.S.A.          | 2011 | DWV                                                               | 100%                     | [93]      |       |
| <u>Curculionidae</u>            |                                            |       |                 |      |                                                                   |                          |           |       |
| <i>Scolopterus penicillatus</i> | Wild                                       | Adult | New Zealand     | 2019 | DWV                                                               | 100%                     | [91]      |       |
| <u>Nitidulidae</u>              |                                            |       |                 |      |                                                                   |                          |           |       |
| <i>Aethina tumida</i>           | Wild                                       | Adult | U.S.A.          | 2011 | IAPV<br>BQCV                                                      | 78.0%<br>5.00%           | [93]      |       |
|                                 |                                            |       | Hawaii          | 2012 | BQCV                                                              | -                        |           | [130] |
|                                 |                                            |       | U.S.A.          | 2008 | SBV                                                               | 33.4%                    |           | [82]  |
|                                 |                                            |       | U.S.A.          | 2011 | SBV                                                               | 11.0%                    |           | [93]  |
|                                 |                                            |       | Hawaii          | 2012 | SBV                                                               | -                        |           | [130] |
|                                 |                                            |       | U.S.A.          | 2017 | DWV* <sup>7</sup>                                                 | 70.0%                    |           | [164] |
|                                 |                                            |       | U.S.A.          | 2011 | DWV                                                               | 72.0%                    |           | [93]  |
|                                 |                                            |       | Hawaii          | 2012 | DWV                                                               | -                        |           | [130] |
|                                 |                                            |       | U.S.A.          | 2007 | DWV*                                                              | 97.0%                    |           | [232] |
|                                 |                                            |       | U.S.A.          | 2019 | DWV                                                               |                          |           | [86]  |
|                                 | Artificial Infection                       | Adult | U.S.A.          | 2007 | DWV*                                                              | 97.0%                    | [232]     |       |
|                                 |                                            |       | U.S.A.          | 2019 | DWV                                                               |                          | [86]      |       |
|                                 |                                            |       | U.S.A.          | 2017 | KBV* <sup>7</sup>                                                 | 20.0%                    | [164]     |       |
|                                 |                                            |       | U.S.A.          | 2011 | KBV                                                               | 44.0%                    | [93]      |       |
|                                 |                                            |       | Mexico          | 2018 | <i>AmFV</i> <sup>8,9</sup>                                        | 100%                     | [148]     |       |
|                                 |                                            |       | U.S.A.          | 2017 | <i>N. ceranae</i>                                                 | 70.0%                    | [164]     |       |
|                                 |                                            |       | Mexico          | 2018 | <i>N. ceranae</i> <sup>9</sup>                                    | 25.0%                    | [148]     |       |
|                                 |                                            |       | U.S.A.          | 2017 | <i>L. passim</i> <sup>7</sup>                                     | 40.0%                    | [164]     |       |
|                                 |                                            |       | Mexico          | 2018 | <i>L. passim</i> <sup>8,9</sup>                                   | 83.4%                    | [148]     |       |
|                                 |                                            |       | U.S.A.          | 2017 | <i>C. mellificae</i> <sup>7</sup>                                 | 30.0%                    | [164]     |       |
|                                 | Wild                                       | Adult | U.S.A.          | 2017 | <i>C. bombi</i> <sup>8</sup>                                      | 50.0%                    | [148]     |       |
|                                 |                                            |       | Mexico          | 2018 | <i>C. bombi</i> <sup>8</sup>                                      | 50.0%                    | [148]     |       |
|                                 |                                            |       | U.S.A.          | 2017 | <i>C. mellificae</i> <sup>7</sup>                                 | 30.0%                    | [164]     |       |
|                                 |                                            |       | Mexico          | 2018 | <i>C. mellificae</i> <sup>7</sup>                                 | 30.0%                    | [164]     |       |
|                                 |                                            |       | U.S.A.          | 2017 | <i>C. mellificae</i> <sup>7</sup>                                 | 30.0%                    | [164]     |       |
|                                 |                                            |       | Mexico          | 2018 | <i>C. mellificae</i> <sup>7</sup>                                 | 30.0%                    | [164]     |       |
|                                 |                                            |       | U.S.A.          | 2017 | <i>C. mellificae</i> <sup>7</sup>                                 | 30.0%                    | [164]     |       |
|                                 |                                            |       | Mexico          | 2018 | <i>C. mellificae</i> <sup>7</sup>                                 | 30.0%                    | [164]     |       |
|                                 |                                            |       | U.S.A.          | 2017 | <i>C. mellificae</i> <sup>7</sup>                                 | 30.0%                    | [164]     |       |
|                                 |                                            |       | Mexico          | 2018 | <i>C. mellificae</i> <sup>7</sup>                                 | 30.0%                    | [164]     |       |
|                                 | <i>Ascosphaera</i> spp. <sup>8</sup> 16.7% |       |                 |      |                                                                   |                          |           |       |
| <u>Tenebrionidae</u>            |                                            |       |                 |      |                                                                   |                          |           |       |
| Undetermined Tenebrionidae      | Wild                                       | Adult | U.S.A.          | 2011 | DWV                                                               | 100%                     | [93]      |       |
| <b>ROACH</b>                    |                                            |       |                 |      |                                                                   |                          |           |       |
| <u>Blattidea</u>                |                                            |       |                 |      |                                                                   |                          |           |       |
| <i>Celatoblatta</i> spp.        | Wild                                       | Adult | New Zealand     | 2019 | DWV*                                                              | -                        | [91]      |       |
|                                 |                                            |       |                 |      | KBV                                                               | -                        |           |       |
|                                 |                                            |       |                 |      | Moku virus                                                        | -                        |           |       |
| <i>Maoriblatta</i> spp.         | Wild                                       | Adult | New Zealand     | 2019 | DWV                                                               | -                        | [91]      |       |
|                                 |                                            |       |                 |      | Moku virus                                                        | -                        |           |       |
| <u>Ectobiidae</u>               |                                            |       |                 |      |                                                                   |                          |           |       |
| <i>Blattella germanica</i>      | Wild                                       | Adult | U.S.A.          | 2011 | BQCV                                                              | 50.0%                    | [93]      |       |
|                                 |                                            |       |                 |      | SBV                                                               | 75.0%                    |           |       |
|                                 |                                            |       |                 |      | DWV                                                               | 100%                     |           |       |

|                              |      |        |             |      |             |       |      |
|------------------------------|------|--------|-------------|------|-------------|-------|------|
| <b><u>EARWIG</u></b>         |      |        |             |      |             |       |      |
| <b><u>Forficulidae</u></b>   |      |        |             |      |             |       |      |
| <i>Forficula auricularia</i> | Wild | Adult  | U.S.A.      | 2011 | IAPV        | 40.0% | [93] |
|                              |      |        |             |      | BQCV        | 60.0% |      |
|                              |      |        |             |      | SBV         | 50.0% |      |
|                              |      |        |             |      | DWV         | 100%  |      |
|                              |      |        | New Zealand | 2019 | DWV         | -     | [91] |
|                              |      |        | U.S.A.      | 2011 | KBV         | 20.0% | [93] |
|                              |      |        | New Zealand | 2019 | KBV         | -     | [91] |
| <b><u>BUG</u></b>            |      |        |             |      |             |       |      |
| <b><u>Pentatomidae</u></b>   |      |        |             |      |             |       |      |
| <i>Halymorpha halys</i>      | Wild | Adult  | U.S.A.      | 2011 | DWV         | 100%  | [93] |
| <b><u>CRICKET</u></b>        |      |        |             |      |             |       |      |
| <b><u>Trigonidiidae</u></b>  |      |        |             |      |             |       |      |
| <i>Bobilla</i> spp.          | Wild | Adult  | New Zealand | 2019 | DWV         | -     | [91] |
|                              |      |        |             |      | KBV*        | -     |      |
| <b><u>BUTTERFLY</u></b>      |      |        |             |      |             |       |      |
| Undetermined Lepidoptera     | Wild | Adult  | U.S.A.      | 2011 | IAPV        | 9.00% | [93] |
|                              |      |        |             |      | BQCV        | 9.00% |      |
|                              |      |        |             |      | SBV         | 9.00% |      |
|                              |      |        |             |      | DWV         | 27.0% |      |
| <b><u>Papilionidae</u></b>   |      |        |             |      |             |       |      |
| Undetermined Papilionoidae   | Wild | Adult  | U.S.A.      | 2011 | DWV         | 100%  | [93] |
| <b><u>MOTH</u></b>           |      |        |             |      |             |       |      |
| <b><u>Pyralidae</u></b>      |      |        |             |      |             |       |      |
| <i>Galleria melonella</i>    | Wild | Larvae | U.S.A.      | 2011 | IAPV        | 14.0% | [93] |
|                              |      |        |             |      | BQCV        | 33.0% |      |
|                              |      |        |             |      | SBV         | 29.0% |      |
|                              |      |        |             |      | DWV         | 71.0% |      |
|                              |      |        |             |      | KBV         | 10.0% |      |
| <b><u>SPIDER</u></b>         |      |        |             |      |             |       |      |
| Undetermined Aranae          | Wild | Adult  | U.S.A.      | 2011 | IAPV        | 10.0% | [93] |
|                              |      |        |             |      | BQCV        | 10.0% |      |
|                              |      |        |             |      | SBV         | 10.0% |      |
|                              |      |        |             |      | DWV         | 80.0% |      |
| Undetermined Opiliones       | Wild | Adult  | U.S.A.      | 2011 | IAPV        | 10.0% | [93] |
|                              |      |        |             |      | BQCV        | 10.0% |      |
|                              |      |        |             |      | DWV         | 10.0% |      |
| <b><u>Salticidae</u></b>     |      |        |             |      |             |       |      |
| <i>Helpis minitabunda</i>    | Wild | Adult  | New Zealand | 2019 | DWV         | 100%  | [91] |
|                              |      |        |             |      | Moku virus  | 100%  |      |
| <b><u>Theridiidae</u></b>    |      |        |             |      |             |       |      |
| <i>Steatoda capensis</i>     | Wild | Adult  | New Zealand | 2019 | KBV         | -     | [91] |
|                              |      |        |             |      | Moku virus* | -     |      |

Legend: Bold and underlined taxon indicates the taxonomic group; Underlined taxon indicates the family; -: no calculated; \*: replicative virus; superscript “7”-“9”: indicate the coinfection reported in the same study -: no calculated; IAPV: Israeli Acute Paralysis Virus; BQCV: Black Queen Cell Virus; SBV: Sacbrood Virus; DWV: Deforming Wing Virus; LSV: Lake Sani Virus; AmFV: *Apis mellifera* Filamentous Virus; KBV: Kashmir Bee Virus.
